# Supplementary material for: Chromosomal inversion polymorphisms shape the genomic landscape of deer mice
Source: PubMed Central journal article supplement (PMC9715431; doi:10.1038/s41559-022-01890-0), 2022-10-17
Supplement: 41559_2022_1890_MOESM1_ESM.pdf [file 41559_2022_1890_MOESM1_ESM.pdf]

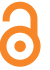

---

# Chromosomal inversion polymorphisms shape the genomic landscape of deer mice

---

In the format provided by the authors and unedited

**Supplementary Table 1. List of samples for each population included in this study.** Samples from populations *a* – *m* included in this study, listed by population from Fig. 4a, with subspecies labels for focal populations, and ecotype labels for forest and prairie populations with the following descriptors: *Sample.ID*: unique ID for each sample; *Museum.ID*: museum accession number for that sample; *Latitude/Longitude*: geographic coordinates from which sample was collected; *Source*: institution, researcher, or NCBI project from which the tissue or sequencing data was obtained (MCZ = Museum of Comparative Zoology, Harvard University; MSB = Museum of Southwestern Biology, University of New Mexico; USFS = US Forest Service; UM = University of Michigan; internal = internal from Hoekstra lab); *Sequencing*: type of sequencing data obtained for that sample (WGS = whole-genome re-sequencing; exome = exome-sequencing); *SRA.run*: NCBI SRA run identifier.

| Sample.ID                                                    | Museum.ID | Latitude | Longitude | Source             | Sequencing | SRA.run     |
|--------------------------------------------------------------|-----------|----------|-----------|--------------------|------------|-------------|
| <b>Population a</b>                                          |           |          |           |                    |            |             |
| FSB11                                                        | MCZ69737  | 49.28    | -122.57   | MCZ                | WGS        | SRR20309002 |
| FSB25                                                        | MCZ69784  | 49.27    | -122.57   | MCZ                | WGS        | SRR20309000 |
| FSB37                                                        |           | 49.28    | -122.57   | internal           | WGS        | SRR20309014 |
| FSB42                                                        |           | 49.28    | -122.57   | internal           | WGS        | SRR20309012 |
| FSB43                                                        | MCZ69794  | 49.28    | -122.57   | MCZ                | WGS        | SRR20309010 |
| FSB48                                                        | MCZ69756  | 49.27    | -122.57   | MCZ                | WGS        | SRR20309008 |
| FSB6                                                         | MCZ69733  | 49.27    | -122.57   | MCZ                | WGS        | SRR20309016 |
| FSB7                                                         | MCZ69734  | 49.27    | -122.57   | MCZ                | WGS        | SRR20309005 |
| FSB51                                                        |           | 49.27    | -122.58   | internal           | WGS        | SRR20730174 |
| FSB52                                                        | MCZ69797  | 49.27    | -122.58   | MCZ                | WGS        | SRR20730172 |
| FSB53                                                        |           | 49.27    | -122.58   | internal           | WGS        | SRR20730171 |
| <b>Population b</b>                                          |           |          |           |                    |            |             |
| 476_3_1                                                      |           | 48.66    | -110.46   | Sam Cushman (USFS) | WGS        | SRR20730164 |
| 477_1_4                                                      |           | 48.66    | -110.46   | Sam Cushman (USFS) | WGS        | SRR20730163 |
| 479_2_1                                                      |           | 48.66    | -110.46   | Sam Cushman (USFS) | WGS        | SRR20730161 |
| <b>Population c (<i>P. m. rubidus</i>; forest ecotype)</b>   |           |          |           |                    |            |             |
| ERH21                                                        | MCZ69553  | 44.24    | -123.95   | PRJNA688305        | WGS        | SRR13318612 |
| ERH27                                                        | MCZ69544  | 44.27    | -124.04   | PRJNA688305        | WGS        | SRR13318609 |
| ERH36                                                        | MCZ69566  | 44.22    | -124.01   | PRJNA688305        | WGS        | SRR13318608 |
| ERH52                                                        | MCZ69555  | 44.24    | -123.95   | PRJNA688305        | WGS        | SRR13318601 |
| ERH19                                                        | MCZ70244  | 44.27    | -124.03   | PRJNA688305        | WGS        | SRR13318613 |
| ERH48                                                        | MCZ69563  | 44.22    | -124.01   | PRJNA688305        | WGS        | SRR13318602 |
| ERH26                                                        | MCZ70248  | 44.27    | -124.04   | PRJNA688305        | WGS        | SRR13318610 |
| ERH14                                                        | MCZ70242  | 44.27    | -124.03   | PRJNA688305        | WGS        | SRR13318614 |
| ERH25                                                        | MCZ70247  | 44.22    | -123.92   | PRJNA688305        | WGS        | SRR13318611 |
| ERH38                                                        |           | 44.22    | -124.01   | PRJNA688305        | WGS        | SRR13318607 |
| ERH42                                                        | MCZ70254  | 44.27    | -124.03   | PRJNA688305        | WGS        | SRR13318606 |
| ERH12                                                        | MCZ70240  | 44.27    | -124.04   | PRJNA688305        | WGS        | SRR13318616 |
| ERH43                                                        |           | 44.22    | -124.01   | PRJNA688305        | WGS        | SRR13318605 |
| ERH46                                                        | MCZ69562  | 44.22    | -124.01   | PRJNA688305        | WGS        | SRR13318603 |
| ERH53                                                        |           | 44.24    | -123.95   | PRJNA688305        | WGS        | SRR13318600 |
| <b>Population d</b>                                          |           |          |           |                    |            |             |
| SRR8782118                                                   | MVZ207860 | 37.55    | -120.36   | PRJNA528923        | exome      | SRR8782118  |
| SRR8782119                                                   | MVZ207863 | 37.53    | -120.35   | PRJNA528923        | exome      | SRR8782119  |
| SRR8782120                                                   | MVZ207864 | 37.54    | -120.49   | PRJNA528923        | exome      | SRR8782120  |
| SRR8782121                                                   | MVZ207843 | 37.62    | -120.52   | PRJNA528923        | exome      | SRR8782121  |
| SRR8782123                                                   | MVZ207839 | 37.67    | -120.48   | PRJNA528923        | exome      | SRR8782123  |
| SRR8782191                                                   | MVZ207878 | 37.70    | -120.24   | PRJNA528923        | exome      | SRR8782191  |
| SRR8782192                                                   | MVZ207847 | 37.51    | -120.40   | PRJNA528923        | exome      | SRR8782192  |
| SRR8782195                                                   | MVZ207842 | 37.67    | -120.47   | PRJNA528923        | exome      | SRR8782195  |
| SRR8782196                                                   | MVZ207851 | 37.55    | -120.35   | PRJNA528923        | exome      | SRR8782196  |
| SRR8782197                                                   | MVZ207866 | 37.63    | -120.21   | PRJNA528923        | exome      | SRR8782197  |
| SRR8782200                                                   | MVZ207870 | 37.66    | -120.22   | PRJNA528923        | exome      | SRR8782200  |
| SRR8782201                                                   | MVZ207856 | 37.55    | -120.36   | PRJNA528923        | exome      | SRR8782201  |
| SRR8782202                                                   | MVZ207828 | 37.50    | -120.07   | PRJNA528923        | exome      | SRR8782202  |
| SRR8782205                                                   | MVZ207830 | 37.64    | -120.15   | PRJNA528923        | exome      | SRR8782205  |
| SRR8782207                                                   | MVZ207832 | 37.67    | -120.46   | PRJNA528923        | exome      | SRR8782207  |
| <b>Population e (<i>P. m. gambelii</i>; prairie ecotype)</b> |           |          |           |                    |            |             |
| ERH108                                                       | MCZ69536  | 44.85    | -117.64   | PRJNA688305        | WGS        | SRR13318593 |

|        |          |       |         |             |     |             |
|--------|----------|-------|---------|-------------|-----|-------------|
| ERH87  | MCZ70287 | 44.81 | -117.66 | PRJNA688305 | WGS | SRR13318653 |
| ERH99  | MCZ70296 | 44.81 | -117.60 | PRJNA688305 | WGS | SRR13318667 |
| ERH95  | MCZ70292 | 44.81 | -117.66 | PRJNA688305 | WGS | SRR13318700 |
| ERH97  | MCZ70294 | 44.81 | -117.60 | PRJNA688305 | WGS | SRR13318678 |
| ERH100 | MCZ70297 | 44.81 | -117.60 | PRJNA688305 | WGS | SRR13318615 |
| ERH110 | MCZ70302 | 44.81 | -117.66 | PRJNA688305 | WGS | SRR13318725 |
| ERH83  | MCZ70286 | 44.85 | -117.64 | PRJNA688305 | WGS | SRR13318714 |
| ERH88  | MCZ70288 | 44.82 | -117.63 | PRJNA688305 | WGS | SRR13318642 |
| ERH89  | MCZ70289 | 44.82 | -117.63 | PRJNA688305 | WGS | SRR13318631 |
| ERH90  | MCZ70290 | 44.85 | -117.64 | PRJNA688305 | WGS | SRR13318758 |
| ERH96  | MCZ70293 | 44.81 | -117.60 | PRJNA688305 | WGS | SRR13318689 |
| ERH107 | MCZ70300 | 44.82 | -117.63 | PRJNA688305 | WGS | SRR13318604 |
| ERH93  | MCZ70291 | 44.81 | -117.66 | PRJNA688305 | WGS | SRR13318747 |
| ERH94  | MCZ69534 | 44.85 | -117.64 | PRJNA688305 | WGS | SRR13318736 |

**Population f**

|           |           |       |         |     |     |             |
|-----------|-----------|-------|---------|-----|-----|-------------|
| MSB280706 | MSB280706 | 33.40 | -108.59 | MSB | WGS | SRR20309015 |
| MSB280708 | MSB280708 | 33.40 | -108.59 | MSB | WGS | SRR20309004 |
| MSB280720 | MSB280720 | 33.40 | -108.58 | MSB | WGS | SRR20309001 |
| MSB280729 | MSB280729 | 33.40 | -108.58 | MSB | WGS | SRR20308999 |
| MSB280948 | MSB280948 | 33.40 | -108.58 | MSB | WGS | SRR20309013 |
| MSB280961 | MSB280961 | 33.40 | -108.58 | MSB | WGS | SRR20309011 |
| MSB280963 | MSB280963 | 33.40 | -108.58 | MSB | WGS | SRR20309009 |
| MSB280964 | MSB280964 | 33.40 | -108.58 | MSB | WGS | SRR20309007 |
| MSB280968 | MSB280968 | 33.40 | -108.59 | MSB | WGS | SRR20309006 |
| MSB280977 | MSB280977 | 33.40 | -108.58 | MSB | WGS | SRR20309003 |
| MSB280721 | MSB280721 | 33.40 | -108.58 | MSB | WGS | SRR20730107 |
| MSB280893 | MSB280893 | 33.40 | -108.58 | MSB | WGS | SRR20730104 |
| MSB280973 | MSB280973 | 33.40 | -108.58 | MSB | WGS | SRR20730103 |

**Population g**

|            |  |       |         |             |       |            |
|------------|--|-------|---------|-------------|-------|------------|
| SRR8782108 |  | 39.59 | -105.64 | PRJNA528923 | exome | SRR8782108 |
| SRR8782109 |  | 39.59 | -105.64 | PRJNA528923 | exome | SRR8782109 |
| SRR8782110 |  | 39.59 | -105.64 | PRJNA528923 | exome | SRR8782110 |
| SRR8782111 |  | 39.59 | -105.64 | PRJNA528923 | exome | SRR8782111 |
| SRR8782112 |  | 39.59 | -105.64 | PRJNA528923 | exome | SRR8782112 |
| SRR8782113 |  | 39.59 | -105.64 | PRJNA528923 | exome | SRR8782113 |
| SRR8782114 |  | 39.59 | -105.64 | PRJNA528923 | exome | SRR8782114 |
| SRR8782115 |  | 39.59 | -105.64 | PRJNA528923 | exome | SRR8782115 |
| SRR8782116 |  | 39.59 | -105.64 | PRJNA528923 | exome | SRR8782116 |
| SRR8782157 |  | 39.59 | -105.64 | PRJNA528923 | exome | SRR8782157 |
| SRR8782158 |  | 39.59 | -105.64 | PRJNA528923 | exome | SRR8782158 |
| SRR8782159 |  | 39.59 | -105.64 | PRJNA528923 | exome | SRR8782159 |
| SRR8782160 |  | 39.59 | -105.64 | PRJNA528923 | exome | SRR8782160 |
| SRR8782161 |  | 39.59 | -105.64 | PRJNA528923 | exome | SRR8782161 |
| SRR8782162 |  | 39.59 | -105.64 | PRJNA528923 | exome | SRR8782162 |
| SRR8782165 |  | 39.59 | -105.64 | PRJNA528923 | exome | SRR8782165 |
| SRR8782166 |  | 39.59 | -105.64 | PRJNA528923 | exome | SRR8782166 |
| SRR8782167 |  | 39.59 | -105.64 | PRJNA528923 | exome | SRR8782167 |
| SRR8782169 |  | 39.59 | -105.64 | PRJNA528923 | exome | SRR8782169 |
| SRR8782170 |  | 39.59 | -105.64 | PRJNA528923 | exome | SRR8782170 |
| SRR8782171 |  | 39.59 | -105.64 | PRJNA528923 | exome | SRR8782171 |
| SRR8782172 |  | 39.59 | -105.64 | PRJNA528923 | exome | SRR8782172 |
| SRR8782173 |  | 39.59 | -105.64 | PRJNA528923 | exome | SRR8782173 |
| SRR8782174 |  | 39.59 | -105.64 | PRJNA528923 | exome | SRR8782174 |
| SRR8782175 |  | 39.59 | -105.64 | PRJNA528923 | exome | SRR8782175 |
| SRR8782176 |  | 39.59 | -105.64 | PRJNA528923 | exome | SRR8782176 |
| SRR8782177 |  | 39.59 | -105.64 | PRJNA528923 | exome | SRR8782177 |
| SRR8782178 |  | 39.59 | -105.64 | PRJNA528923 | exome | SRR8782178 |
| SRR8782179 |  | 39.59 | -105.64 | PRJNA528923 | exome | SRR8782179 |
| SRR8782180 |  | 39.59 | -105.64 | PRJNA528923 | exome | SRR8782180 |
| SRR8782181 |  | 39.59 | -105.64 | PRJNA528923 | exome | SRR8782181 |
| SRR8782182 |  | 39.59 | -105.64 | PRJNA528923 | exome | SRR8782182 |
| SRR8782183 |  | 39.59 | -105.64 | PRJNA528923 | exome | SRR8782183 |
| SRR8782184 |  | 39.59 | -105.64 | PRJNA528923 | exome | SRR8782184 |
| SRR8782185 |  | 39.59 | -105.64 | PRJNA528923 | exome | SRR8782185 |
| SRR8782186 |  | 39.59 | -105.64 | PRJNA528923 | exome | SRR8782186 |
| SRR8782187 |  | 39.59 | -105.64 | PRJNA528923 | exome | SRR8782187 |

|                                            |          |       |         |                    |       |             |
|--------------------------------------------|----------|-------|---------|--------------------|-------|-------------|
| SRR8782188                                 |          | 39.59 | -105.64 | PRJNA528923        | exome | SRR8782188  |
| SRR8782189                                 |          | 39.59 | -105.64 | PRJNA528923        | exome | SRR8782189  |
| SRR8782190                                 |          | 39.59 | -105.64 | PRJNA528923        | exome | SRR8782190  |
| SRR8782193                                 |          | 39.59 | -105.64 | PRJNA528923        | exome | SRR8782193  |
| SRR8782194                                 |          | 39.59 | -105.64 | PRJNA528923        | exome | SRR8782194  |
| SRR8782199                                 |          | 39.59 | -105.64 | PRJNA528923        | exome | SRR8782199  |
| SRR8782203                                 |          | 39.59 | -105.64 | PRJNA528923        | exome | SRR8782203  |
| SRR8782204                                 |          | 39.59 | -105.64 | PRJNA528923        | exome | SRR8782204  |
| SRR8782206                                 |          | 39.59 | -105.64 | PRJNA528923        | exome | SRR8782206  |
| <b>Population h</b>                        |          |       |         |                    |       |             |
| SRR8782117                                 |          | 40.81 | -96.68  | PRJNA528923        | exome | SRR8782117  |
| SRR8782122                                 |          | 40.81 | -96.68  | PRJNA528923        | exome | SRR8782122  |
| SRR8782124                                 |          | 40.81 | -96.68  | PRJNA528923        | exome | SRR8782124  |
| SRR8782125                                 |          | 40.81 | -96.68  | PRJNA528923        | exome | SRR8782125  |
| SRR8782126                                 |          | 40.81 | -96.68  | PRJNA528923        | exome | SRR8782126  |
| SRR8782127                                 |          | 40.81 | -96.68  | PRJNA528923        | exome | SRR8782127  |
| SRR8782128                                 |          | 40.81 | -96.68  | PRJNA528923        | exome | SRR8782128  |
| SRR8782129                                 |          | 40.81 | -96.68  | PRJNA528923        | exome | SRR8782129  |
| SRR8782130                                 |          | 40.81 | -96.68  | PRJNA528923        | exome | SRR8782130  |
| SRR8782131                                 |          | 40.81 | -96.68  | PRJNA528923        | exome | SRR8782131  |
| SRR8782132                                 |          | 40.81 | -96.68  | PRJNA528923        | exome | SRR8782132  |
| SRR8782133                                 |          | 40.81 | -96.68  | PRJNA528923        | exome | SRR8782133  |
| SRR8782134                                 |          | 40.81 | -96.68  | PRJNA528923        | exome | SRR8782134  |
| SRR8782135                                 |          | 40.81 | -96.68  | PRJNA528923        | exome | SRR8782135  |
| SRR8782136                                 |          | 40.81 | -96.68  | PRJNA528923        | exome | SRR8782136  |
| SRR8782137                                 |          | 40.81 | -96.68  | PRJNA528923        | exome | SRR8782137  |
| SRR8782139                                 |          | 40.81 | -96.68  | PRJNA528923        | exome | SRR8782139  |
| SRR8782141                                 |          | 40.81 | -96.68  | PRJNA528923        | exome | SRR8782141  |
| SRR8782142                                 |          | 40.81 | -96.68  | PRJNA528923        | exome | SRR8782142  |
| SRR8782143                                 |          | 40.81 | -96.68  | PRJNA528923        | exome | SRR8782143  |
| SRR8782144                                 |          | 40.81 | -96.68  | PRJNA528923        | exome | SRR8782144  |
| SRR8782145                                 |          | 40.81 | -96.68  | PRJNA528923        | exome | SRR8782145  |
| SRR8782146                                 |          | 40.81 | -96.68  | PRJNA528923        | exome | SRR8782146  |
| SRR8782147                                 |          | 40.81 | -96.68  | PRJNA528923        | exome | SRR8782147  |
| SRR8782148                                 |          | 40.81 | -96.68  | PRJNA528923        | exome | SRR8782148  |
| SRR8782149                                 |          | 40.81 | -96.68  | PRJNA528923        | exome | SRR8782149  |
| SRR8782150                                 |          | 40.81 | -96.68  | PRJNA528923        | exome | SRR8782150  |
| SRR8782151                                 |          | 40.81 | -96.68  | PRJNA528923        | exome | SRR8782151  |
| SRR8782152                                 |          | 40.81 | -96.68  | PRJNA528923        | exome | SRR8782152  |
| SRR8782153                                 |          | 40.81 | -96.68  | PRJNA528923        | exome | SRR8782153  |
| SRR8782154                                 |          | 40.81 | -96.68  | PRJNA528923        | exome | SRR8782154  |
| SRR8782155                                 |          | 40.81 | -96.68  | PRJNA528923        | exome | SRR8782155  |
| SRR8782156                                 |          | 40.81 | -96.68  | PRJNA528923        | exome | SRR8782156  |
| SRR8782163                                 |          | 40.81 | -96.68  | PRJNA528923        | exome | SRR8782163  |
| SRR8782164                                 |          | 40.81 | -96.68  | PRJNA528923        | exome | SRR8782164  |
| <b>Population i</b>                        |          |       |         |                    |       |             |
| JJK_4190                                   | MCZ70690 | 38.30 | -84.51  | MCZ                | WGS   | SRR20730162 |
| JJK_4191                                   | MCZ70691 | 38.30 | -84.51  | MCZ                | WGS   | SRR20730151 |
| JJK_4192                                   | MCZ70692 | 38.30 | -84.51  | MCZ                | WGS   | SRR20730140 |
| <b>Population j (<i>P. m. bairdii</i>)</b> |          |       |         |                    |       |             |
| MZ10760                                    |          | 42.20 | -83.89  | Cody Thompson (UM) | WGS   | SRR20730094 |
| MZ10762                                    |          | 42.20 | -83.89  | Cody Thompson (UM) | WGS   | SRR20730092 |
| MZ10764                                    |          | 42.20 | -83.89  | Cody Thompson (UM) | WGS   | SRR20730091 |
| MZ10770                                    |          | 42.20 | -83.89  | Cody Thompson (UM) | WGS   | SRR20730090 |
| MZ10772                                    |          | 42.20 | -83.89  | Cody Thompson (UM) | WGS   | SRR20730089 |
| MZ10774                                    |          | 42.20 | -83.89  | Cody Thompson (UM) | WGS   | SRR20730088 |
| MZ10804                                    |          | 42.20 | -83.89  | Cody Thompson (UM) | WGS   | SRR20730087 |
| MZ10808                                    |          | 42.20 | -83.89  | Cody Thompson (UM) | WGS   | SRR20730214 |
| MZ10812                                    |          | 42.20 | -83.89  | Cody Thompson (UM) | WGS   | SRR20730213 |
| MZ10813                                    |          | 42.20 | -83.89  | Cody Thompson (UM) | WGS   | SRR20730211 |
| MZ10814                                    |          | 42.20 | -83.89  | Cody Thompson (UM) | WGS   | SRR20730210 |
| MZ10815                                    |          | 42.20 | -83.89  | Cody Thompson (UM) | WGS   | SRR20730209 |
| MZ10884                                    |          | 42.20 | -83.89  | Cody Thompson (UM) | WGS   | SRR20730208 |
| MZ10885                                    |          | 42.20 | -83.89  | Cody Thompson (UM) | WGS   | SRR20730207 |
| MZ11010                                    |          | 42.20 | -83.89  | Cody Thompson (UM) | WGS   | SRR20730206 |
| MZ11011                                    |          | 42.20 | -83.89  | Cody Thompson (UM) | WGS   | SRR20730205 |

|                                               |           |       |         |                    |     |              |
|-----------------------------------------------|-----------|-------|---------|--------------------|-----|--------------|
| MZ11012                                       |           | 42.20 | -83.89  | Cody Thompson (UM) | WGS | SRR20730204  |
| <b>Population k</b>                           |           |       |         |                    |     |              |
| EPK001                                        |           | 45.41 | -84.16  | internal           | WGS | SRR20730048  |
| EPK002                                        |           | 45.41 | -84.16  | internal           | WGS | SRR20730047  |
| EPK003                                        |           | 45.41 | -84.16  | internal           | WGS | SRR20730046  |
| EPK004                                        |           | 45.41 | -84.16  | internal           | WGS | SRR20730045  |
| EPK005                                        |           | 45.41 | -84.16  | internal           | WGS | SRR20730044  |
| EPK006                                        |           | 45.41 | -84.16  | internal           | WGS | SRR20730043  |
| EPK007                                        |           | 45.41 | -84.16  | internal           | WGS | SRR20730042  |
| EPK008                                        |           | 45.41 | -84.16  | internal           | WGS | SRR20730041  |
| EPK010                                        |           | 45.41 | -84.16  | internal           | WGS | SRR20730039  |
| EPK011                                        |           | 45.41 | -84.16  | internal           | WGS | SRR20730038  |
| EPK012                                        |           | 45.41 | -84.16  | internal           | WGS | SRR20730037  |
| EPK014                                        |           | 45.41 | -84.16  | internal           | WGS | SRR20730036  |
| EPK017                                        |           | 45.41 | -84.16  | internal           | WGS | SRR20730035  |
| EPK018                                        |           | 45.41 | -84.16  | internal           | WGS | SRR20730034  |
| EPK019                                        |           | 45.41 | -84.16  | internal           | WGS | SRR20730033  |
| <b>Population l (<i>P. m. nubiterrae</i>)</b> |           |       |         |                    |     |              |
| EPK04                                         |           | 40.33 | -79.27  | internal           | WGS | SRR19238025  |
| EPK14                                         |           | 40.33 | -79.27  | internal           | WGS | SRR20730135  |
| EPK07                                         |           | 40.33 | -79.27  | internal           | WGS | SRR20730134  |
| EPK11                                         |           | 40.33 | -79.27  | internal           | WGS | SRR20730133  |
| EPK17                                         |           | 40.33 | -79.27  | internal           | WGS | SRR20730132  |
| EPK08                                         |           | 40.33 | -79.27  | internal           | WGS | SRR20730131  |
| EPK02                                         |           | 40.33 | -79.27  | internal           | WGS | SRR20730130  |
| EPK03                                         |           | 40.33 | -79.27  | internal           | WGS | SRR20730128  |
| EPK01                                         |           | 40.33 | -79.27  | internal           | WGS | SRR20730127  |
| EPK15                                         |           | 40.33 | -79.27  | internal           | WGS | SRR20730126  |
| EPK10                                         |           | 40.33 | -79.27  | internal           | WGS | SRR20730125  |
| EPK18                                         |           | 40.33 | -79.27  | internal           | WGS | SRR20730124  |
| EPK09                                         |           | 40.33 | -79.27  | internal           | WGS | SRR20730123  |
| EPK16                                         |           | 40.33 | -79.27  | internal           | WGS | SRR20730122  |
| NUB13                                         |           | 40.33 | -79.27  | internal           | WGS | SRR20730121  |
| <b>Population m (<i>P. p. subgriseus</i>)</b> |           |       |         |                    |     |              |
| 68144                                         | MCZ68144  | 29.18 | -81.80  | MCZ                | WGS | SRR19237879  |
| 68146                                         | MCZ68146  | 29.18 | -81.80  | MCZ                | WGS | SRR19237877  |
| 68147                                         | MCZ68147  | 29.18 | -81.80  | MCZ                | WGS | SRR19237876  |
| 68148                                         | MCZ68148  | 29.18 | -81.80  | MCZ                | WGS | SRR19237875  |
| 68149                                         | MCZ68149  | 29.18 | -81.80  | MCZ                | WGS | SRR19237874  |
| 68150                                         | MCZ68150  | 29.18 | -81.80  | MCZ                | WGS | SRR19237873  |
| 68151                                         | MCZ68151  | 29.18 | -81.80  | MCZ                | WGS | SRR19237872  |
| 68152                                         | MCZ68152  | 29.18 | -81.80  | MCZ                | WGS | SRR19237871  |
| 68153                                         | MCZ68153  | 29.18 | -81.80  | MCZ                | WGS | SRR19237870  |
| 68154                                         | MCZ68154  | 29.18 | -81.80  | MCZ                | WGS | SRR19237869  |
| 68159                                         | MCZ68159  | 29.18 | -81.80  | MCZ                | WGS | SRR19237868  |
| 68160                                         | MCZ68160  | 29.18 | -81.80  | MCZ                | WGS | SRR19237866  |
| 68161                                         | MCZ68161  | 29.18 | -81.80  | MCZ                | WGS | SRR19237961  |
| 68162                                         | MCZ68162  | 29.18 | -81.80  | MCZ                | WGS | SRR19237960  |
| 68163                                         | MCZ68163  | 29.18 | -81.80  | MCZ                | WGS | SRR19237959  |
| <b><i>P. leucopus</i></b>                     |           |       |         |                    |     |              |
| MSB_212419                                    | MSB212419 | 36.10 | -94.00  | MSB                | WGS | SRR20730233  |
| MSB_212420                                    | MSB212420 | 36.10 | -94.00  | MSB                | WGS | SRR20730232  |
| MSB_212421                                    | MSB212421 | 36.10 | -94.00  | MSB                | WGS | SRR20730106  |
| MSB_53354                                     | MSB53354  | 46.90 | -96.50  | MSB                | WGS | SRR20730167  |
| MSB_53355                                     | MSB53355  | 46.90 | -96.50  | MSB                | WGS | SRR20730166  |
| MSB_53357                                     | MSB53357  | 46.90 | -96.50  | MSB                | WGS | SRR20730165  |
| MSB_229927                                    | MSB229927 | 43.60 | -73.70  | MSB                | WGS | SRR20730144  |
| MSB_229967                                    | MSB229967 | 43.60 | -73.70  | MSB                | WGS | SRR20730143  |
| MSB_42375                                     | MSB42375  | 33.85 | -100.79 | MSB                | WGS | SRR20730115  |
| MSB_42378                                     | MSB42378  | 33.85 | -100.79 | MSB                | WGS | SRR20730114  |
| MSB_42402                                     | MSB42402  | 33.85 | -100.79 | MSB                | WGS | SRR20730113  |
| <b><i>P. californicus</i></b>                 |           |       |         |                    |     |              |
| 47_IS_F_17437                                 |           | NA    | NA      | internal           | WGS | SRR20730224  |
| IS_SRA                                        |           | NA    | NA      | PRJNA53595         | WGS | SAMN01081713 |
